# Supplementary material for: Identification of Discrete Sites in Yip1A Necessary for Regulation of Endoplasmic Reticulum Structure
Source: PLoS One. 2013 Jan 14;8(1):e54413. doi: 10.1371/journal.pone.0054413 (PMC3544793; doi:10.1371/journal.pone.0054413)
Supplement: Table S1 — All Yip1A variants assessed in this study. For each mutant variant, the precise amino acid change, subcellular localization and efficiency of rescue are indicated. (XLS) [file pone.0054413.s002.xls]

## Sheet: Sheet 1 - Table 1
Construct Name	Mutation	Localization	Efficiency of Rescue
Yip1A (wt)	none	ER/ERES	0.995
Yip1AN/Sec61ßTM	Yip1A (AA1-125) and Sec61ß (AA61-97)	ERES	0
∆1-83	∆1-83	ER/ERES	0.99
∆1-118	∆1-118	ER	0.031
Cytoplasmic Domain
E89G	E89G	ER/ERES	0.981203
PP90,91AA	PP90,91AA	ER/ERES	1
LL92,93AA	LL92,93AA	ER/ERES	0.531814
L92A	L92A	ER/ERES	0.848209
L92D	L92D	ER/ERES	0.149669
L93A	L93A	ER/ERES	0.96164
E94K	E94K	ER/ERES	0.985507
E95K	E95K	ER/ERES	-0.196429
LG96,97AA	LG96,97AA	ER/ERES	-0.0245715
L96A	L96A	ER/ERES	0.767637
L96D	L96D	ER/ERES	-0.0406043
G97A	G97A	ER/ERES	0.975309
IN98,99AA	IN98,99AA	ER/ERES	0.852965
I98A	I98A	ER/ERES	0.999757
N99A	N99A	ER/ERES	0.999514
F100A	F100A	ER/ERES	0.992949
F100D	F100D	ER/ERES	0.995279
D101A	D101A	ER/ERES	0.974359
HI102,103AA	HI102,103AA	ER/ERES	0.986751
I103D	I103D	ER/ERES	0.930595
WQ104,105AA	WQ104,105AA	ER/ERES	0.999935
KT106,107AA	KT106,107AA	ER/ERES	0.976608
LT108,109AA	LT108,109AA	ER/ERES	0.999806
VL110,111AA	VL110,111AA	ER/ERES	0.986538
HP112,113AA	HP112,113AA	ER/ERES	1
Transmembrane Domain
TM1_1	GPMVFC129-134AALLLA	ER/ERES	0.966159
TM1_full	GPMVFCLAFGAT129-140AALLLALALAAA	ER/ERES	0.968307
Loop1	LAGKIQF143-149AAAAAAA	ER/ERES	0.244078
Loop1(LAGK)	LAGK143-146AAAA	ER/ERES	0.254323
Loop1(IQF)	IQF147-149AAA	ER/ERES	0.971007
Loop1(L143A)	L143A	ER/ERES	0.975098
Loop1(A144N)	A144N	ER/ERES	0.99591
Loop1(G145A)	G145A	ER/ERES	0.974661
Loop1(K146E)	K146E	ER/ERES	0.58934
TM2_1	GYVYGISA150-157ALLLALAA	ER/ERES	0.0689509
TM2_2	IGCLGMFCLLN158-168LAALALLALLA	ER/ERES	0.105036
TM2_1_1(GYVY)	GYVY150-153ALLL	ER/ERES	0.0602582
TM2(G150A)	G150A	ER/ERES	0.967033
TM2(Y151L)	Y151L	ER/ERES	0.970468
TM2(V152L)	V152L	ER/ERES	0.719219
TM2(Y153L)	Y153L	ER/ERES	0.914584
TM2_1_2(GISA)	GISA154-157ALAA	ER/ERES	0.703013
TM2_2_1 (IGCLG)	IGCLG158-162LAALA	ER/ERES	0.982305
TM2_2_2_1(MFC)	MFC163-165LLA	ER/ERES	0.959866
TM2_2_2_2(LLN)	LLN166-168VVA	ER/ERES	0.180124
TM2(LL166,167VV)	LL166,167VV	ER/ERES	0.985551
TM2(N168A)	N168A	ER/ERES	0.99361
Loop2(LMS)	LMS169-171AAA	ER/ERES	0.942523
Loop2(MTGV)	MTGV172-175AAAA	ER/ERES	0.979654
Loop3(ISALAM)	ISALAM227-232AAAAAA	ER/ERES	1
Loop4(E234K)	E234K	ER/ERES	0.99361
Loop4(G235A)	G235A	ER/ERES	1
Loop4(Q236A)	Q236A	ER/ERES	1
Loop4(Q237A)	Q237A	ER/ERES	1
Loopr(L238A)	L238A	ER/ERES	0.994249
Loop3(EGQQL)	EGQQL234-238AAAAA	ER/ERES	0.133203
TM5(LL237,238VV)	LL238,239VV	ER/ERES	0.953164
TM4_1(LVAYPCA)	VAYPC240-244LALAL	ER/ERES	0.0504758
TM4_1_1(LVAY)	VAY240-242LAL	ER/ERES	0.990444
TM4_1_2(PCA)	PC243,244AL	ER/ERES	0.977066
TM4_2(LLYGVFA)	YGVF248-251LALL	ER/ERES	0.967989
Loop4(LISVF)	ISVF254-257AAAA	ER/ERES	0.952007
K146E/V152L	K146E/V152L	ER/ERES	-0.0650447
		ER - endoplasmic reticulum
		ERES - ER exit site
